# Supplementary material for: Gold nanoring-enhanced generation of singlet oxygen: an intricate correlation with surface plasmon resonance and polyelectrolyte bilayers
Source: Royal Society of Chemistry journal article supplement (doi:10.1039/c6ra22814c), 2016-01-01
Supplement: c6ra22814c1.pdf [file c6ra22814c1.pdf]

## **Electronic Supplementary Information (ESI)**

# **Gold Nanoring-Enhanced Generation of Singlet Oxygen: An Intricate Correlation with Surface Plasmon Resonance and Polyelectrolyte Bilayers**

YueHu<sup>a,\*‡</sup>, Jiri Kanka<sup>b</sup>, Kai Liu<sup>a</sup>, YaminYang<sup>c,§</sup>, HongjunWang<sup>c</sup> and Henry Du<sup>a,\*</sup>

<sup>a</sup>Department of Chemical Engineering and Materials Science, Stevens Institute of Technology, Hoboken, New Jersey 07030

<sup>b</sup>Institute of Photonics and Electronics, Academy of Science of the Czech Republic, Chaberska 57, 18251 Prague, Czech Republic

<sup>c</sup>Department of Biomedical Engineering, Chemistry and Biological Sciences, Stevens Institute of Technology, Hoboken, New Jersey 07030

\*Corresponding authors: hdu@stevens.edu; yh348@cornell.edu

‡Present address: Department of Biological and Environmental Engineering, Cornell University, Ithaca, NY 14853, USA

§Present address: Department of Biomedical Engineering, Nanjing University of Aeronautics and Astronautics, Nanjing, Jiangsu 211106, China

**Table S1.** Summary of film thickness of PSS/PAH multilayers in H<sub>2</sub>O.

| <b>Bilayer No.</b>   | <b>1</b> | <b>2</b> | <b>3</b> | <b>4</b> | <b>5</b> | <b>10</b> | <b>15</b> | <b>20</b> |
|----------------------|----------|----------|----------|----------|----------|-----------|-----------|-----------|
| <b>Thickness(nm)</b> | 1.3      | 3        | 5.4      | 7.3      | 10.1     | 26.6      | 42.0      | 68.1      |
| <b>STD.</b>          | 0.2      | 0.4      | 0.2      | 0.3      | 0.2      | 0.5       | 2.2       | 3.3       |

**Table S2.** LSPR peak position, outer diameter, inner diameter, height and **ratio of outer/inner diameter** of five different Au NRs.

| <b>Au NR</b> | <b>LSPR (nm)</b> | <b>outer dia. (nm)</b> | <b>inner dia. (nm)</b> | <b>height (nm)</b> | <b>ratio of outer/<br/>inner dia.</b> |
|--------------|------------------|------------------------|------------------------|--------------------|---------------------------------------|
| Au NR I      | 823              | 46.6 ± 2.6             | 34.7 ± 2.1             | 14.0 ± 1.4         | 1.3 ± 0.1                             |
| Au NR II     | 737              | 32.9 ± 1.1             | 15.7 ± 1.7             | 13.4 ± 0.4         | 2.1 ± 0.2                             |
| Au NR III    | 723              | 29.5 ± 1.3             | 16.7 ± 1.0             | 9.7 ± 2.1          | 1.8 ± 0.1                             |
| Au NR IV     | 607              | 24.8 ± 0.8             | 6.3 ± 0.8              | 10.2 ± 0.4         | 4.0 ± 0.5                             |
| Au NR V      | 574              | 21.5 ± 1.5             | 5.9 ± 0.7              | 9.8 ± 0.8          | 3.7 ± 0.4                             |

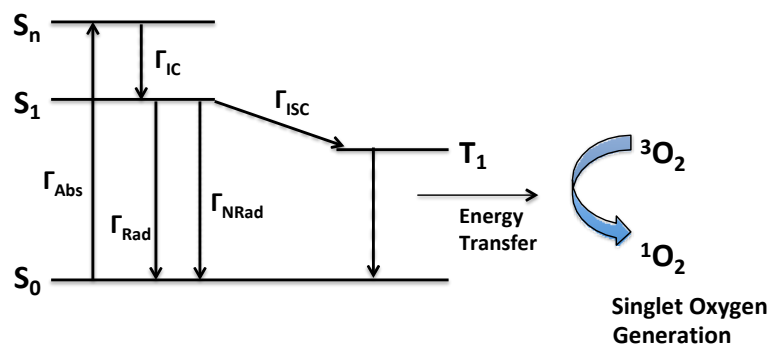

**Fig.S1.** Schematic Jablonski diagram for photosensitized  $^1O_2$  generation.
